# Supplementary material for: Investigating the Impact of Food Rewards on Children’s Motivation to Participate in Sport
Source: Preprints.org preprint supplement (doi:10.20944/preprints202301.0565.v1), 2023-01-31
Supplement: Supplementary file 1 [file supplementary]

**Inductive Themes and Codes**

| **Themes** | **Subthemes** | **Codes** |
| --- | --- | --- |
| **The Culture of Food in Soccer and Hockey** | Venue Food  Team Snacks  Time Constraints and the Convenience of Fast Food | - Types of Food - Expectation of certain types - Utilized - Food in Soccer - Food in Hockey - Post-Soccer Food - Post-Hockey Food - Pre-Soccer Food - Pre-Hockey Food - Tournament Food |
| **The How and Why of Motivating Child Athletes** | Rewards  Rationale for Rewards  (Un)importance of Rewarding  Tradition  Intrinsically Motivated Children  Athlete’s Favorite Part of Soccer and Hockey | - Rewards in Soccer - Rewards in Hockey - Motivating Children/Athletes - Game vs Practice Motivation - Parents Motivating Athletes - Importance of Treats - Importance of Rewards - Participation without Rewards - Rationale for Rewards - Child’s Participation Rationale |
| **Opinions of Sponsorship in**  **Youth Sport** | Financial Support  Appropriateness | - Opinion - Appropriateness - Community Involvement - Monetary Support - No opinion |
