# Supplementary figures and images for: Investigating the Impact of Food Rewards on Children’s Motivation to Participate in Sport
Source: Preprints.org preprint supplement (doi:10.20944/preprints202301.0565.v1), 2023-01-31

## Graphic Elicitation Examples

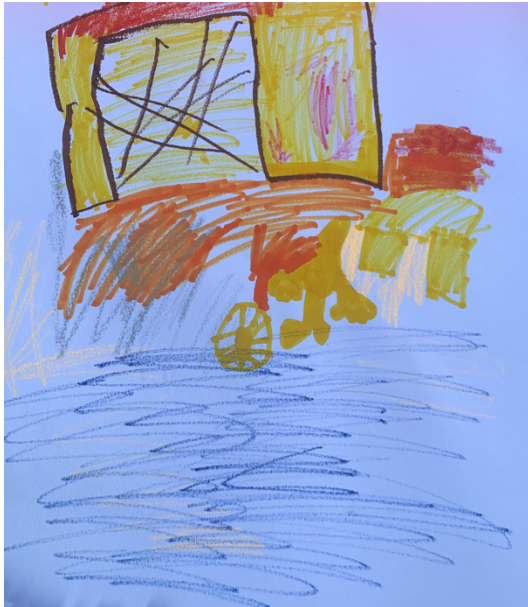

SFG1 A3

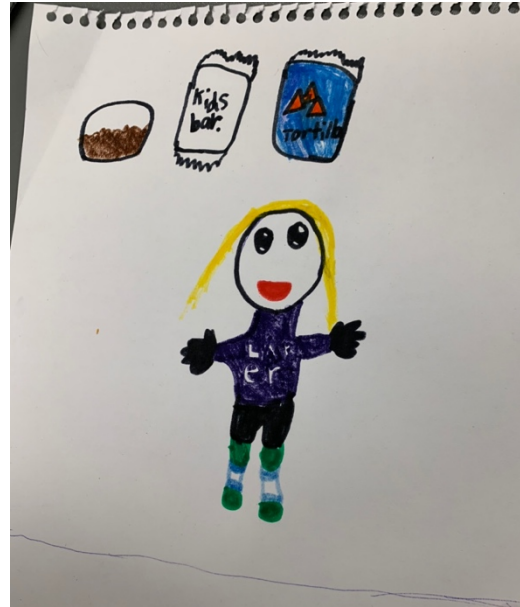

HFG6 A4

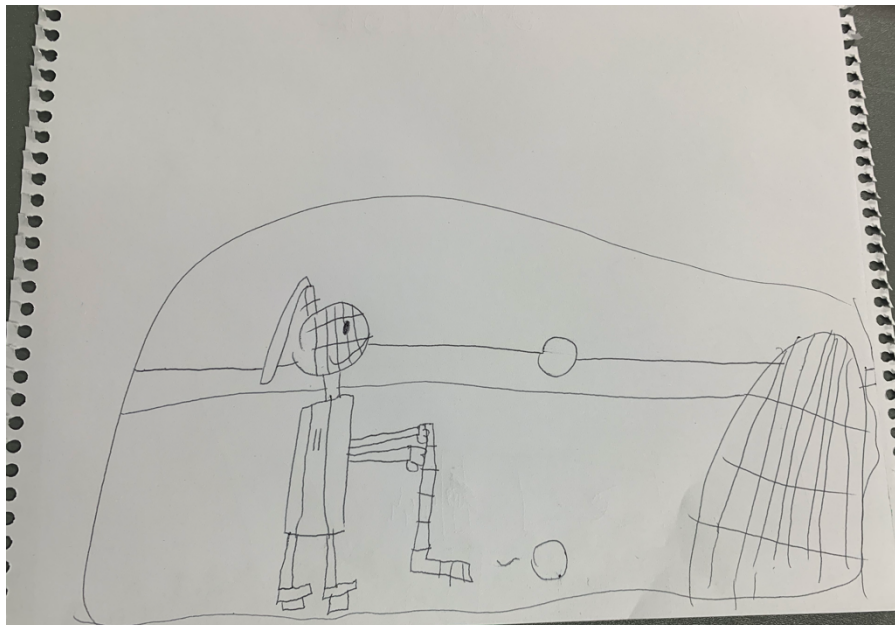

HFG6 A1

Supplement: Supplementary file 1 [file supplementary]
